# Supplementary material for: Carbon-based binary organic photocatalysts for rapid dye degradation under weak light: performance and mechanistic study
Source: Royal Society of Chemistry journal article supplement (doi:10.1039/d4tc02316a), 2024-01-01
Supplement: d4tc02316a1.pdf [file d4tc02316a1.pdf]

## Supporting Information

### Carbon-Based Binary Organic Photocatalyst for Rapid Dye Degradation under Weak Light: Performance and Mechanistic Study

Ciyuan Huang <sup>a, e</sup>, Shasha Shi <sup>a, e</sup>, Songlin Cai <sup>a, e</sup>, Yue Qiao <sup>a, c</sup>, Caiyun Wang <sup>c\*</sup>, Linji Yang <sup>a</sup>, Yuchen Wang <sup>a</sup>, Hao Cheng <sup>b\*</sup>, Tao Yang <sup>d</sup>, Kai Huang <sup>c</sup>, Bingsuo Zou <sup>a</sup>, Tao Liu <sup>a\*</sup>

a. C. Huang, S. Shi, S. Cai, Y. Qiao, L. Yang, Prof. B. Zou, Prof. T. Liu,  
School of Chemistry and Chemical Engineering, State Key Laboratory of Featured Metal Materials and Life-cycle Safety for Composite Structures, School of Resources, Environment and Materials, Guangxi University, Nanning 530004, China.

Email: liutaozhx@gxu.edu.cn

b. Prof. H. Cheng

Guangxi Key Laboratory of Green Processing of Sugar Resources, College of Biological and Chemical Engineering, Guangxi University of Science and Technology, Liuzhou 545006, Guangxi, P.R. China.

Email: iamchenghao@126.com

c. Y. Qiao, Prof. K. Huang, Prof. C. Wang,

Guangxi Vocational & Technical Institute of Industry, Nanning 530001, China.

Email: wangcaiyun@gxgy.edu.cn

d. Prof. T. Yang.

Centre for Mechanical Technology and Automation, Department of Mechanical Engineering, University of Aveiro, 3810-193 Aveiro, Portugal.

e. These authors contributed equally.

**Table S1.** Identified intermediates in the PM7:ITC-2Cl@C system

**Table S2.** The hole and electron mobility of PM7:ITC-2Cl blend films.

**Table S3.** Ecotoxicity of inter mediate products of Congo red

**Table S4.** BET surface area and pore diameter of the as-prepared samples.

**Figure S1.** (a) Photoluminescence (PL) spectra and TRPL spectra of PM7:ITC-2Cl. (b) Transient photocurrent responses spectrum (b) and EIS test (c) of PM7:ITC-2Cl blend films and TiO<sub>2</sub>.

**Figure S2.** The mobility of hole (a) and electron (b) of PM7:ITC-2Cl blend films.

**Figure S3.** Pore width of PM7:ITC-2Cl@C.

**Figure S4.** TEM image of PM7:ITC-2Cl.

**Figure S5.** The degradation efficiency of CR under weak light irradiation without photocatalysts.

**Figure S6.** (a) Reproducibility study of PM7:ITC-2Cl@C. (b) Variation of TOC contents in different simulated aquatic environment containing 100mg/ L of CR.

**Figure S7.** Possible degradation products of CR after irradiation, as determined by LC–MS spectrum.

**Figure S8.** Natural Population Analysis (NPA) charge distribution on Congo red at different electron state and calculated Fukui index levels.

**Figure S9.** (a) Chemical structure (Mulliken population) of P1. (b) Figure out the bond length of the P1 molecule.

**Figure S10.** Calculate the Fukui number per atom of the resulting P1 molecule.

**Figure S11.** (a) Chemical structure (Mulliken population) of P2. (b) Figure out the bond length of the P2 molecule.

**Figure S12.** Calculate the Fukui number per atom of the resulting P2molecule.

**Figure S13.** (a) Chemical structure (Mulliken population) of P3. (b) Figure out the bond length of the P3 molecule. (c) Calculate the Fukui number per atom of the resulting P3molecule.

**Figure S14.** (a) Chemical structure (Mulliken population) of P4. (b) Figure out the bond length of the P4 molecule. (c) Calculate the Fukui number per atom of the resulting P4molecule.

**Figure S15.** (a) Chemical structure (Mulliken population) of P5. (b) Figure out the bond length of the P5 molecule. (c) Calculate the Fukui number per atom of the resulting P5molecule.

**Figure S16.** (a) Chemical structure (Mulliken population) of P6. (b) Figure out the bond length of the P6molecule. (c) Calculate the Fukui number per atom of the resulting P6molecul

**Figure S17.** Photocatalytic degradation performance toward other two typical dyeing contaminants: Rhodamine B (RhB) and Methylene blue (MB).

**Table S1.** BET surface area and pore diameter of the as-prepared samples.

| <b>Samples</b>      | <b>S<sub>BET</sub> (m<sup>2</sup>/g)</b> | <b>Pore diameter (nm)</b> |
|---------------------|------------------------------------------|---------------------------|
| Raw biochar         | 1190.3                                   | 0.7                       |
| PM7:ITC-2Cl@C       | 914.1                                    | 0.9                       |
| TiO <sub>2</sub> @C | 301.6                                    | 1.9                       |

**Table S2.** The hole and electron mobility of PM7:ITC-2Cl blend films.

| <b>Sample</b> | <b>Hole mobility</b> | <b>electron mobility</b> |
|---------------|----------------------|--------------------------|
| PM7:ITC-2Cl   | 0.000650             | 0.000390                 |

**Table S3.** Identified intermediates in the PM7:ITC-2Cl@C system.

| Compound                                                                               | Formula           | MW<br>(g/mol) | Molecular structure                                                                  |
|----------------------------------------------------------------------------------------|-------------------|---------------|--------------------------------------------------------------------------------------|
| 1-Naphthalenamine,<br>2,2'-[[1,1'-biphenyl]-<br>4,4'-diylbis(2,1-<br>diazenediyl)]bis- | $C_{32}H_{24}N_6$ | 492.59        | 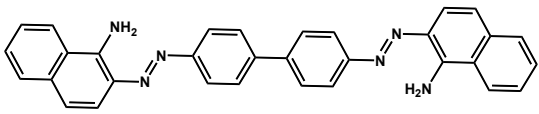   |
|                                                                                        | $C_{32}H_{22}N_4$ | 462.56        |    |
| 1,1'-Biphenyl, 4-<br>nitro-, radical ion(1-<br>)                                       | $C_{12}H_9NO_2$   | 199.21        |  |
| 4,4'-Biphenol                                                                          | $C_{12}H_{10}O_2$ | 186.21        |  |
| 4-Phenylphenol                                                                         | $C_{12}H_{10}O$   | 170.21        |  |
| 4,4'-Dinitrobiphenyl                                                                   | $C_{12}H_8N_2O_4$ | 244.21        |  |

**Table S4.** Ecotoxicity of inter mediate products of Congo red.

|     | Fish<br>(LC50) | Daphnid<br>(LC50) | Green Algae<br>(EC50) | Fish<br>(ChV) | Daphnid<br>(ChV) | Green Algae<br>(ChV) |
|-----|----------------|-------------------|-----------------------|---------------|------------------|----------------------|
| CR  | 5.69           | 10.2              | 15.3                  | 0.015         | 0.169            | 1.1                  |
| DP1 | 0.0009         | 0.068             | 0.050                 | 4.50E-07      | 0.0017           | 0.00066              |
| DP2 | 0.000012       | 0.000015          | 0.00027               | 0.0000029     | 0.000012         | 0.00039              |
| DP3 | 6.3            | 4.14              | 5.63                  | 0.732         | 0.605            | 2.04                 |
| DP4 | 11.3           | 7.28              | 9.22                  | 1.28          | 1.01             | 3.22                 |
| DP5 | 3.07           | 2.37              | 0.284                 | 0.347         | 0.324            | 0.817                |
| DP6 | 3.34           | 19.1              | 2.1                   | 1.63          | 6.81             | 0.316                |

Acute toxicities following the EUP: LC50 >100 or EC50 >100 (Harmless), 10 < LC50 <100 or 10 < EC50 <100 (Harmful), 1 < L50 < or 1 < EC50 < 10 (Noxious), and LC50 and LC50 <1 or EC50 < 1 (Very Toxic). At the same time, chronic toxicity according to the national new chemical substance hazard assessment standard (HJ/T154-2004): ChV >10 (Harmless), 1 < ChV < 10 (Harmful), 0.1 < ChV < 1 (Toxic), and ChV < 0.1 (Very Toxic).

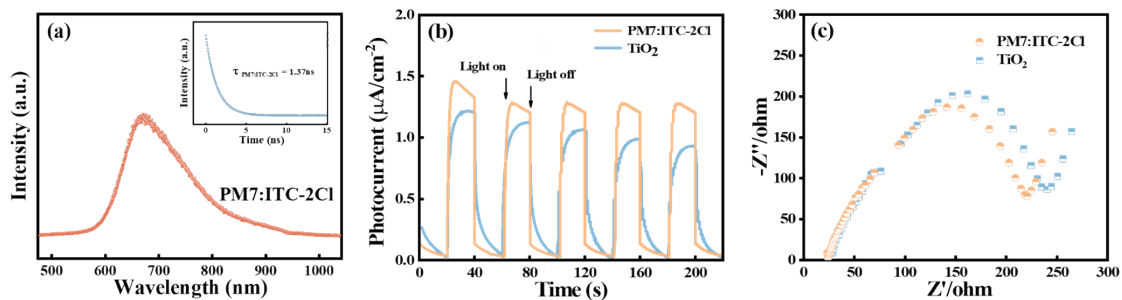

**Figure S1.** (a) Photoluminescence (PL) spectra and TRPL spectra of PM7:ITC-2Cl. (b) Transient photocurrent responses spectrum (b) and EIS test (c) of PM7:ITC-2Cl blend films and TiO<sub>2</sub>.

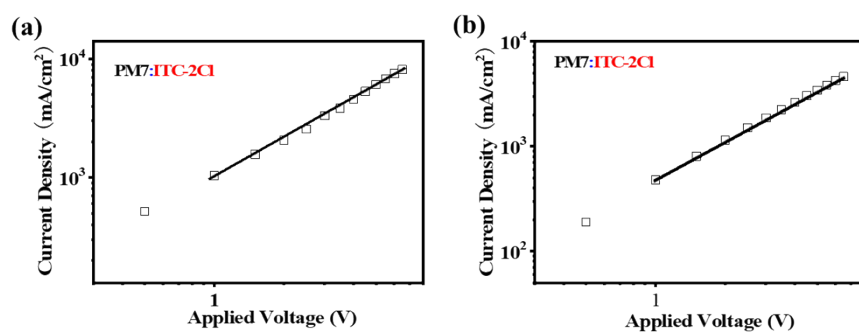

**Figure S2.** The mobility of hole (a) and electron (b) of PM7:ITC-2Cl blend films.

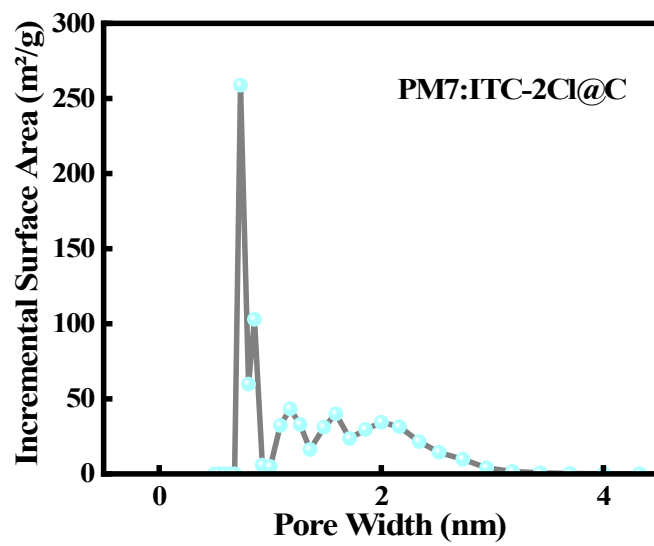

**Figure S3.** Pore width of PM7:ITC-2Cl@C.

**Figure S4.** TEM image of PM7:ITC-2Cl blend films.

The uniform surface morphology of PM7:ITC-2Cl can be reflected in the **Figure S2**, which means a highly ordered structure. The blending films of PM7 and ITC-2Cl show obvious self-aggregation region, with quite clear phase separation and interpenetrating network morphology, which provides a continuous seepage path for charge, facilitates exciton dissociation and carrier transport, and thus improves the effective charge separation.



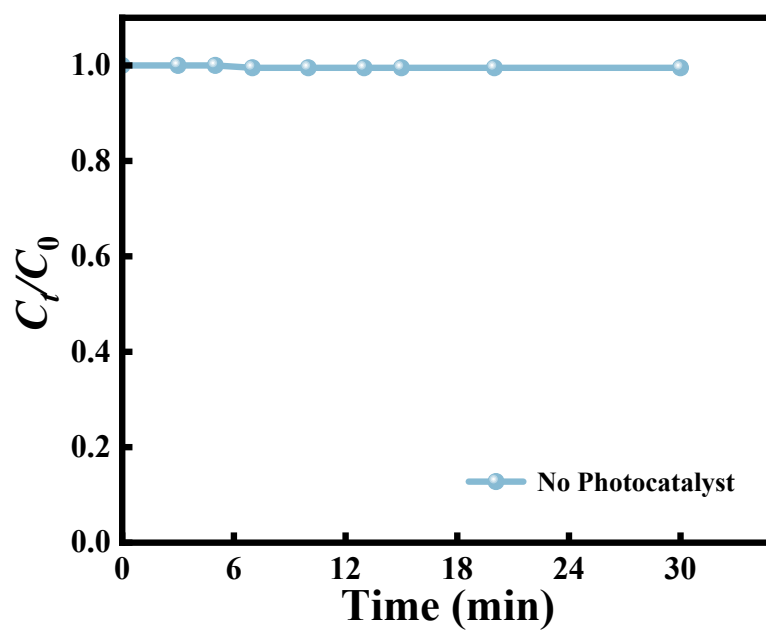

**Figure S5.** The degradation efficiency of CR under weak light irradiation without photocatalysts.

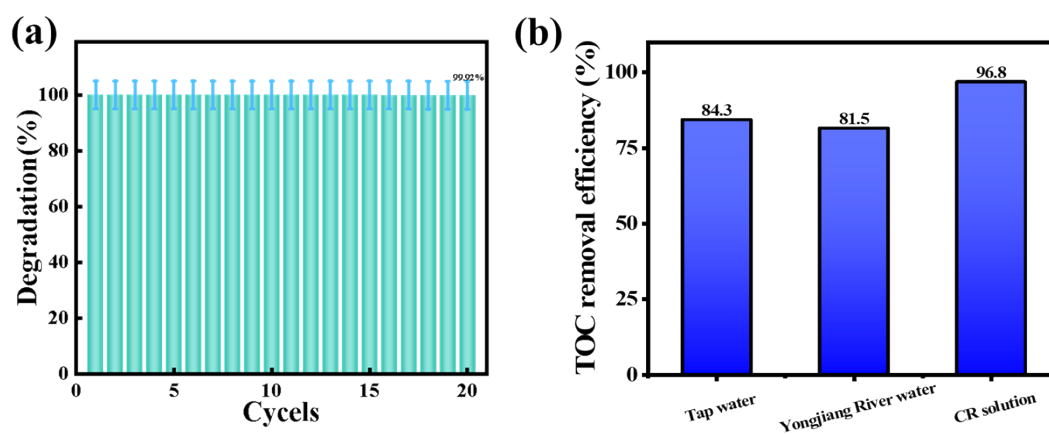

**Figure S6.** (a) Reproducibility study of PM7:ITC-2Cl@C. (b) Variation of TOC contents in different simulated aquatic environment containing 100mg/ L of CR.

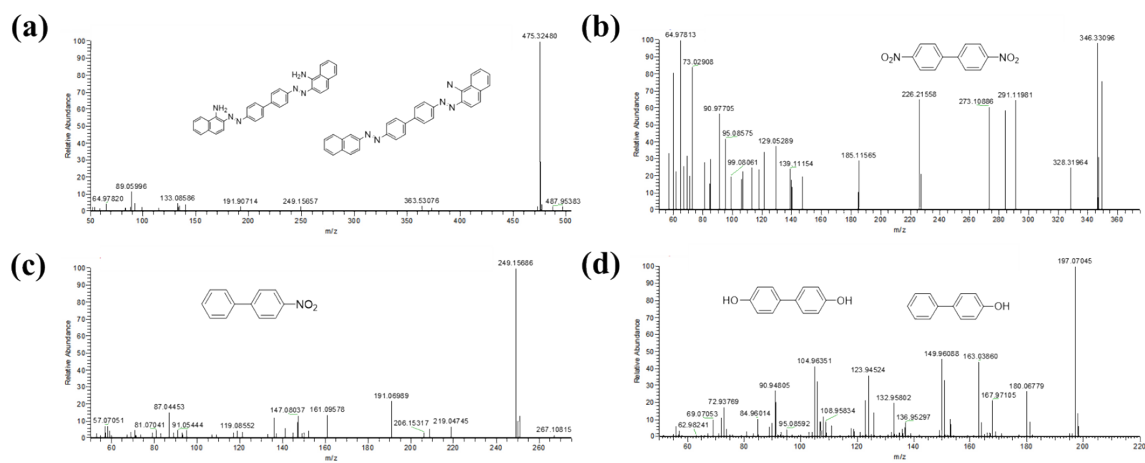

**Figure S7.** Possible degradation products of CR after irradiation, as determined by LC-MS spectrum.

**Figure S8.** Natural Population Analysis (NPA) charge distribution on Congo red at different electron state and calculated Fukui index levels.

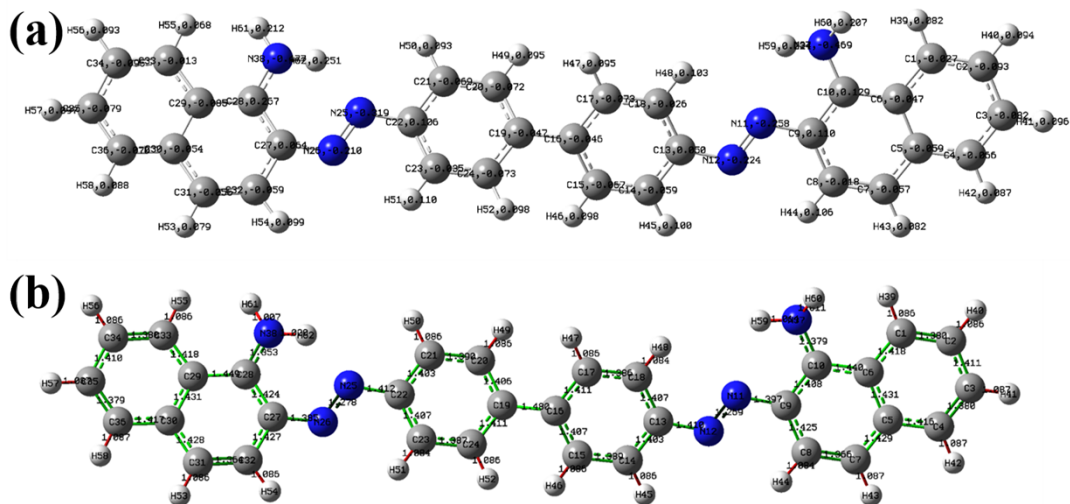

**Figure S9.** (a) Chemical structure (Mulliken population) of P1. (b) Figure out the bond length of the P1 molecule.

| Atom | No | $q_N$    | $q_{N+1}$ | $q_{N-1}$ | $f^2$    | $f^+$    | $f^-$    | $f^0$     |
|------|----|----------|-----------|-----------|----------|----------|----------|-----------|
| C    | 1  | -0.17645 | -0.07942  | -0.06008  | -0.2134  | -0.09703 | 0.11637  | 0.00967   |
| C    | 2  | -0.19994 | -0.11589  | -0.0869   | -0.19709 | -0.08405 | 0.11304  | 0.014495  |
| C    | 3  | -0.18746 | -0.08918  | -0.07194  | -0.2138  | -0.09828 | 0.11552  | 0.00862   |
| C    | 4  | -0.17672 | -0.10058  | -0.0664   | -0.18646 | -0.07614 | 0.11032  | 0.01709   |
| C    | 5  | -0.02978 | -0.00608  | -0.02257  | -0.03091 | -0.0237  | 0.00721  | -0.008245 |
| C    | 6  | -0.09364 | -0.04827  | -0.05195  | -0.08706 | -0.04537 | 0.04169  | -0.00184  |
| C    | 7  | -0.20758 | -0.12488  | -0.02569  | -0.26459 | -0.0827  | 0.18189  | 0.049595  |
| C    | 8  | -0.18136 | -0.07729  | -0.11249  | -0.17294 | -0.10407 | 0.06887  | -0.0176   |
| C    | 9  | 0.06204  | 0.02501   | 0.09506   | 0.00401  | 0.03703  | 0.03302  | 0.035025  |
| C    | 10 | 0.25183  | 0.14171   | 0.17236   | 0.18959  | 0.11012  | -0.07947 | 0.015325  |
| N    | 11 | -0.24323 | -0.08244  | -0.12955  | -0.27447 | -0.16079 | 0.11368  | -0.023555 |
| N    | 12 | -0.23197 | -0.09787  | -0.0914   | -0.27467 | -0.1341  | 0.14057  | 0.003235  |
| C    | 13 | 0.1187   | 0.06698   | 0.0861    | 0.08432  | 0.05172  | -0.0326  | 0.00956   |
| C    | 14 | -0.17062 | -0.08468  | -0.07102  | -0.18554 | -0.08594 | 0.0996   | 0.00683   |
| C    | 15 | -0.19101 | -0.09811  | -0.08609  | -0.19782 | -0.0929  | 0.10492  | 0.00601   |
| C    | 16 | -0.03646 | -0.00673  | 0.00963   | -0.07582 | -0.02973 | 0.04609  | 0.00818   |
| C    | 17 | -0.18388 | -0.1005   | -0.08137  | -0.18589 | -0.08338 | 0.10251  | 0.009565  |
| C    | 18 | -0.19384 | -0.09129  | -0.08546  | -0.21093 | -0.10255 | 0.10838  | 0.002915  |
| C    | 19 | -0.04386 | -0.01237  | 0.0126    | -0.08795 | -0.03149 | 0.05646  | 0.012485  |
| C    | 20 | -0.18865 | -0.09531  | -0.08696  | -0.19503 | -0.09334 | 0.10169  | 0.004175  |
| C    | 21 | -0.18284 | -0.0929   | -0.07378  | -0.199   | -0.08994 | 0.10906  | 0.00956   |
| C    | 22 | 0.13232  | 0.07466   | 0.08994   | 0.10004  | 0.05766  | -0.04238 | 0.00764   |
| C    | 23 | -0.19536 | -0.09556  | -0.08188  | -0.21328 | -0.0998  | 0.11348  | 0.00684   |
| C    | 24 | -0.18002 | -0.09605  | -0.08204  | -0.18195 | -0.08397 | 0.09798  | 0.007005  |
| N    | 25 | -0.30825 | -0.14206  | -0.11919  | -0.35525 | -0.16619 | 0.18906  | 0.011435  |
| N    | 26 | -0.20786 | -0.06317  | -0.12013  | -0.23242 | -0.14469 | 0.08773  | -0.02848  |
| C    | 27 | 0.05337  | 0.01404   | 0.10048   | -0.00778 | 0.03933  | 0.04711  | 0.04322   |
| C    | 28 | 0.24695  | 0.14284   | 0.1566    | 0.19446  | 0.10411  | -0.09035 | 0.00688   |
| C    | 29 | -0.09697 | -0.05044  | -0.04628  | -0.09722 | -0.04653 | 0.05069  | 0.00208   |
| C    | 30 | -0.02397 | -0.00269  | -0.02519  | -0.02006 | -0.02128 | -0.00122 | -0.01125  |
| C    | 31 | -0.23309 | -0.13914  | -0.02317  | -0.30387 | -0.09395 | 0.20992  | 0.057985  |
| C    | 32 | -0.15035 | -0.06331  | -0.0997   | -0.13769 | -0.08704 | 0.05065  | -0.018195 |
| C    | 33 | -0.17324 | -0.07516  | -0.06517  | -0.20615 | -0.09808 | 0.10807  | 0.004995  |
| C    | 34 | -0.20273 | -0.11849  | -0.0816   | -0.20537 | -0.08424 | 0.12113  | 0.018445  |
| C    | 35 | -0.18472 | -0.08609  | -0.07701  | -0.20634 | -0.09863 | 0.10771  | 0.00454   |
| C    | 36 | -0.17822 | -0.10187  | -0.06299  | -0.19158 | -0.07635 | 0.11523  | 0.01944   |
| N    | 37 | -0.76394 | -0.38565  | -0.30843  | -0.8338  | -0.37829 | 0.45551  | 0.03861   |
| N    | 38 | -0.7356  | -0.36245  | -0.28613  | -0.82262 | -0.37315 | 0.44947  | 0.03816   |
| H    | 39 | 0.19598  | 0.09397   | 0.10059   | 0.1974   | 0.10201  | -0.09539 | 0.00331   |
| H    | 40 | 0.20276  | 0.09517   | 0.10799   | 0.20236  | 0.10759  | -0.09477 | 0.00641   |
| H    | 41 | 0.20306  | 0.09407   | 0.10804   | 0.20401  | 0.10899  | -0.09502 | 0.006985  |
| H    | 42 | 0.20249  | 0.0959    | 0.10648   | 0.2026   | 0.10659  | -0.09601 | 0.00529   |
| H    | 43 | 0.20209  | 0.09494   | 0.10617   | 0.20307  | 0.10715  | -0.09592 | 0.005615  |
| H    | 44 | 0.22648  | 0.10984   | 0.11875   | 0.22437  | 0.11664  | -0.10773 | 0.004455  |
| H    | 45 | 0.21355  | 0.09991   | 0.11198   | 0.21521  | 0.11364  | -0.10157 | 0.006035  |
| H    | 46 | 0.20646  | 0.09766   | 0.1075    | 0.20776  | 0.1088   | -0.09896 | 0.00492   |
| H    | 47 | 0.20395  | 0.09701   | 0.10593   | 0.20496  | 0.10694  | -0.09802 | 0.00446   |
| H    | 48 | 0.21252  | 0.10214   | 0.10941   | 0.21349  | 0.11038  | -0.10311 | 0.003635  |
| H    | 49 | 0.20515  | 0.09751   | 0.10704   | 0.20575  | 0.10764  | -0.09811 | 0.004765  |
| H    | 50 | 0.20578  | 0.09697   | 0.10729   | 0.2073   | 0.10881  | -0.09849 | 0.00516   |
| H    | 51 | 0.2252   | 0.1079    | 0.11653   | 0.22597  | 0.1173   | -0.10867 | 0.004315  |
| H    | 52 | 0.2049   | 0.09763   | 0.10707   | 0.2051   | 0.10727  | -0.09783 | 0.00472   |
| H    | 53 | 0.20406  | 0.09597   | 0.10714   | 0.20501  | 0.10809  | -0.09692 | 0.005585  |
| H    | 54 | 0.2141   | 0.10238   | 0.11397   | 0.21185  | 0.11172  | -0.10013 | 0.005795  |
| H    | 55 | 0.18608  | 0.08928   | 0.09596   | 0.18692  | 0.0968   | -0.09012 | 0.00334   |
| H    | 56 | 0.20308  | 0.09541   | 0.10811   | 0.20264  | 0.10767  | -0.09497 | 0.00635   |
| H    | 57 | 0.20353  | 0.09424   | 0.10866   | 0.20416  | 0.10929  | -0.09487 | 0.00721   |
| H    | 58 | 0.20278  | 0.09592   | 0.10668   | 0.20296  | 0.10686  | -0.0961  | 0.00538   |
| H    | 59 | 0.39228  | 0.19538   | 0.19883   | 0.39035  | 0.1969   | -0.19345 | 0.001725  |
| H    | 60 | 0.369    | 0.17866   | 0.19201   | 0.36733  | 0.19034  | -0.17699 | 0.006675  |
| H    | 61 | 0.3769   | 0.18143   | 0.19364   | 0.37873  | 0.19547  | -0.18326 | 0.006105  |
| H    | 62 | 0.42621  | 0.21139   | 0.21401   | 0.42702  | 0.21482  | -0.2122  | 0.00131   |

Figure S10. Calculate the Fukui number per atom of the resulting P1 molecule.

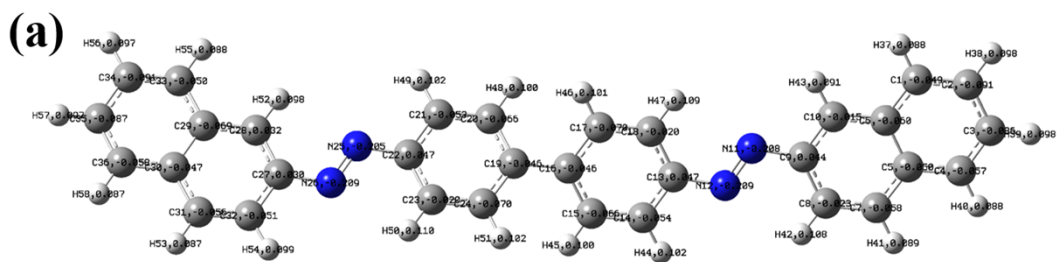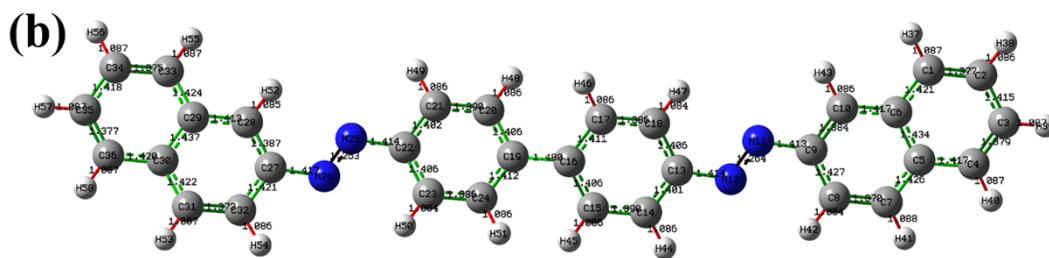

**Figure S11.** (a) Chemical structure (Mulliken population) of P2. (b) Figure out the bond length of the P2 molecule.

| Atom | No | q <sub>N</sub> | q <sub>N-1</sub> | q <sub>N-1</sub> | f <sup>+</sup> | f <sup>-</sup> | f <sup>0</sup> | f <sup>2</sup> |
|------|----|----------------|------------------|------------------|----------------|----------------|----------------|----------------|
| C    | 1  | -0.16742       | -0.07547         | -0.02474         | -0.09195       | 0.14268        | 0.025365       | -0.23463       |
| C    | 2  | -0.19793       | -0.11373         | -0.1057          | -0.0842        | 0.09223        | 0.004015       | -0.17643       |
| C    | 3  | -0.18768       | -0.09087         | -0.03981         | -0.09681       | 0.14787        | 0.02553        | -0.24468       |
| C    | 4  | -0.1786        | -0.09956         | -0.06683         | -0.07904       | 0.11177        | 0.016365       | -0.19081       |
| C    | 5  | -0.04548       | -0.01657         | -0.01527         | -0.02891       | 0.03021        | 0.00065        | -0.05912       |
| C    | 6  | -0.06095       | -0.03404         | -0.04385         | -0.02691       | 0.0171         | -0.004905      | -0.04401       |
| C    | 7  | -0.16863       | -0.10101         | -0.04619         | -0.06762       | 0.12244        | 0.02741        | -0.19006       |
| C    | 8  | -0.20063       | -0.09033         | -0.10953         | -0.1103        | 0.0911         | -0.0096        | -0.2014        |
| C    | 9  | 0.1167         | 0.06032          | 0.08833          | 0.05638        | -0.02837       | 0.014005       | 0.08475        |
| C    | 10 | -0.14446       | -0.05753         | 0.00694          | -0.08693       | 0.1514         | 0.032235       | -0.23833       |
| N    | 11 | -0.21095       | -0.07513         | -0.08789         | -0.13582       | 0.12306        | -0.00638       | -0.25888       |
| N    | 12 | -0.21695       | -0.09152         | -0.10062         | -0.12543       | 0.11633        | -0.00455       | -0.24176       |
| C    | 13 | 0.11559        | 0.06395          | 0.11008          | 0.05164        | -0.00551       | 0.023065       | 0.05715        |
| C    | 14 | -0.16772       | -0.08376         | -0.07276         | -0.08396       | 0.09496        | 0.0055         | -0.17892       |
| C    | 15 | -0.19075       | -0.09828         | -0.07747         | -0.09247       | 0.11328        | 0.010405       | -0.20575       |
| C    | 16 | -0.03368       | -0.00524         | 0.02368          | -0.02844       | 0.05736        | 0.01446        | -0.0858        |
| C    | 17 | -0.18302       | -0.09946         | -0.07582         | -0.08356       | 0.1072         | 0.01182        | -0.19076       |
| C    | 18 | -0.186         | -0.08894         | -0.08334         | -0.09706       | 0.10266        | 0.0028         | -0.19972       |
| C    | 19 | -0.03218       | -0.00668         | 0.02187          | -0.0255        | 0.05405        | 0.014275       | -0.07955       |
| C    | 20 | -0.19123       | -0.09842         | -0.07618         | -0.09281       | 0.11505        | 0.01112        | -0.20786       |
| C    | 21 | -0.16714       | -0.08359         | -0.0746          | -0.08355       | 0.09254        | 0.004495       | -0.17609       |
| C    | 22 | 0.11454        | 0.06495          | 0.10852          | 0.04959        | -0.00602       | 0.021785       | 0.05561        |
| C    | 23 | -0.18513       | -0.08856         | -0.08415         | -0.09657       | 0.10098        | 0.002205       | -0.19755       |
| C    | 24 | -0.18318       | -0.10012         | -0.07538         | -0.08306       | 0.1078         | 0.01237        | -0.19086       |
| N    | 25 | -0.21101       | -0.08721         | -0.10405         | -0.1238        | 0.10696        | -0.00842       | -0.23076       |
| N    | 26 | -0.21154       | -0.07326         | -0.07842         | -0.13828       | 0.13312        | -0.00258       | -0.2714        |
| C    | 27 | 0.1121         | 0.05831          | 0.08805          | 0.05379        | -0.02405       | 0.01487        | 0.07784        |
| C    | 28 | -0.16306       | -0.05662         | 0.00358          | -0.10644       | 0.16664        | 0.0301         | -0.27308       |
| C    | 29 | -0.05413       | -0.03422         | -0.04273         | -0.01991       | 0.0114         | -0.004255      | -0.03131       |
| C    | 30 | -0.04421       | -0.01687         | -0.01391         | -0.02734       | 0.0303         | 0.00148        | -0.05764       |
| C    | 31 | -0.17851       | -0.10302         | -0.04794         | -0.07549       | 0.13057        | 0.02754        | -0.20606       |
| C    | 32 | -0.17943       | -0.08522         | -0.09758         | -0.09421       | 0.08185        | -0.00618       | -0.17606       |
| C    | 33 | -0.16858       | -0.07259         | -0.02087         | -0.09599       | 0.14771        | 0.02586        | -0.2437        |
| C    | 34 | -0.19851       | -0.11542         | -0.10633         | -0.08309       | 0.09218        | 0.004545       | -0.17527       |
| C    | 35 | -0.18804       | -0.0906          | -0.03701         | -0.09744       | 0.15103        | 0.026795       | -0.24847       |
| C    | 36 | -0.18          | -0.09947         | -0.06554         | -0.08053       | 0.11446        | 0.016965       | -0.19499       |
| H    | 37 | 0.20322        | 0.09709          | 0.10525          | 0.10613        | -0.09797       | 0.00408        | 0.2041         |
| H    | 38 | 0.20398        | 0.09605          | 0.10948          | 0.10793        | -0.0945        | 0.006715       | 0.20243        |
| H    | 39 | 0.20341        | 0.09462          | 0.10755          | 0.10879        | -0.09586       | 0.006465       | 0.20465        |
| H    | 40 | 0.20276        | 0.0962           | 0.10719          | 0.10656        | -0.09557       | 0.005495       | 0.20213        |
| H    | 41 | 0.20281        | 0.09549          | 0.10698          | 0.10732        | -0.09583       | 0.005745       | 0.20315        |
| H    | 42 | 0.22645        | 0.11032          | 0.11761          | 0.11613        | -0.10884       | 0.003645       | 0.22497        |
| H    | 43 | 0.21332        | 0.10128          | 0.10976          | 0.11204        | -0.10356       | 0.00424        | 0.2156         |
| H    | 44 | 0.21449        | 0.10008          | 0.11358          | 0.11441        | -0.10091       | 0.00675        | 0.21532        |
| H    | 45 | 0.20754        | 0.09832          | 0.10851          | 0.10922        | -0.09903       | 0.005095       | 0.20825        |
| H    | 46 | 0.20628        | 0.0982           | 0.10768          | 0.10808        | -0.0986        | 0.00474        | 0.20668        |
| H    | 47 | 0.2254         | 0.10758          | 0.11749          | 0.11782        | -0.10791       | 0.004955       | 0.22573        |
| H    | 48 | 0.20762        | 0.09801          | 0.10847          | 0.10961        | -0.09915       | 0.00523        | 0.20876        |
| H    | 49 | 0.2144         | 0.10036          | 0.11309          | 0.11404        | -0.10131       | 0.006365       | 0.21535        |
| H    | 50 | 0.22566        | 0.10744          | 0.11792          | 0.11822        | -0.10774       | 0.00524        | 0.22596        |
| H    | 51 | 0.2065         | 0.09774          | 0.10803          | 0.10876        | -0.09847       | 0.005145       | 0.20723        |
| H    | 52 | 0.22331        | 0.10743          | 0.11386          | 0.11588        | -0.10945       | 0.003215       | 0.22533        |
| H    | 53 | 0.20382        | 0.09526          | 0.10792          | 0.10856        | -0.0959        | 0.00633        | 0.20446        |
| H    | 54 | 0.21409        | 0.10217          | 0.11311          | 0.11192        | -0.10098       | 0.00547        | 0.2129         |
| H    | 55 | 0.20349        | 0.09725          | 0.1052           | 0.10624        | -0.09829       | 0.003975       | 0.20453        |
| H    | 56 | 0.20372        | 0.09558          | 0.10964          | 0.10814        | -0.09408       | 0.00703        | 0.20222        |
| H    | 57 | 0.2031         | 0.09396          | 0.10769          | 0.10914        | -0.09541       | 0.006865       | 0.20455        |
| H    | 58 | 0.20238        | 0.09536          | 0.10742          | 0.10702        | -0.09496       | 0.00603        | 0.20198        |

Figure S12. Calculate the Fukui number per atom of the resulting P2molecule.

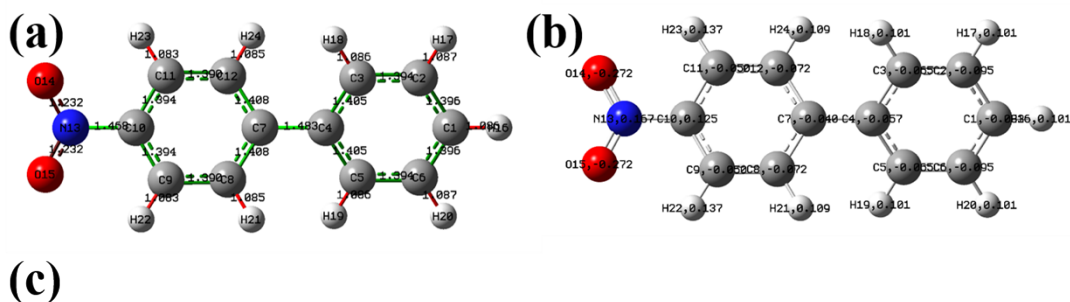

| Atom | No | $q_N$    | $q_{N+1}$ | $q_{N-1}$ | $f^+$    | $f^-$    | $f^0$     | $f^2$    |
|------|----|----------|-----------|-----------|----------|----------|-----------|----------|
| C    | 1  | -0.1905  | -0.0855   | 0.11545   | -0.105   | 0.30595  | 0.100475  | -0.41095 |
| C    | 2  | -0.18941 | -0.11174  | -0.09208  | -0.07767 | 0.09733  | 0.00983   | -0.175   |
| C    | 3  | -0.1848  | -0.08211  | -0.02468  | -0.10269 | 0.16012  | 0.028715  | -0.26281 |
| C    | 4  | -0.05769 | -0.0104   | 0.11375   | -0.04729 | 0.17144  | 0.062075  | -0.21873 |
| C    | 5  | -0.1848  | -0.08211  | -0.02468  | -0.10269 | 0.16012  | 0.028715  | -0.26281 |
| C    | 6  | -0.18941 | -0.11174  | -0.09208  | -0.07767 | 0.09733  | 0.00983   | -0.175   |
| C    | 7  | -0.01062 | 0.02038   | 0.05727   | -0.031   | 0.06789  | 0.018445  | -0.09889 |
| C    | 8  | -0.18582 | -0.10776  | -0.01415  | -0.07806 | 0.17167  | 0.046805  | -0.24973 |
| C    | 9  | -0.17203 | -0.07802  | -0.10453  | -0.09401 | 0.0675   | -0.013255 | -0.16151 |
| C    | 10 | 0.05805  | 0.06245   | 0.18623   | -0.0044  | 0.12818  | 0.06189   | -0.13258 |
| C    | 11 | -0.17203 | -0.07802  | -0.10453  | -0.09401 | 0.0675   | -0.013255 | -0.16151 |
| C    | 12 | -0.18582 | -0.10776  | -0.01415  | -0.07806 | 0.17167  | 0.046805  | -0.24973 |
| N    | 13 | 0.50916  | 0.2962    | 0.23723   | 0.21296  | -0.27193 | -0.029485 | 0.48489  |
| O    | 14 | -0.38668 | -0.19522  | -0.15618  | -0.19146 | 0.2305   | 0.01952   | -0.42196 |
| O    | 15 | -0.38669 | -0.19522  | -0.15618  | -0.19147 | 0.23051  | 0.01952   | -0.42198 |
| H    | 16 | 0.20449  | 0.08902   | 0.11236   | 0.11547  | -0.09213 | 0.01167   | 0.2076   |
| H    | 17 | 0.20512  | 0.09163   | 0.11915   | 0.11349  | -0.08597 | 0.01376   | 0.19946  |
| H    | 18 | 0.20567  | 0.09704   | 0.11363   | 0.10863  | -0.09204 | 0.008295  | 0.20067  |
| H    | 19 | 0.20567  | 0.09704   | 0.11363   | 0.10863  | -0.09204 | 0.008295  | 0.20067  |
| H    | 20 | 0.20512  | 0.09163   | 0.11915   | 0.11349  | -0.08597 | 0.01376   | 0.19946  |
| H    | 21 | 0.21289  | 0.0925    | 0.11402   | 0.12039  | -0.09887 | 0.01076   | 0.21926  |
| H    | 22 | 0.23863  | 0.10761   | 0.13368   | 0.13102  | -0.10495 | 0.013035  | 0.23597  |
| H    | 23 | 0.23863  | 0.10761   | 0.13368   | 0.13102  | -0.10495 | 0.013035  | 0.23597  |
| H    | 24 | 0.21289  | 0.0925    | 0.11402   | 0.12039  | -0.09887 | 0.01076   | 0.21926  |

**Figure S13.** (a) Chemical structure (Mulliken population) of P3. (b) Figure out the bond length of the P3 molecule. (c) Calculate the Fukui number per atom of the resulting P3 molecule.



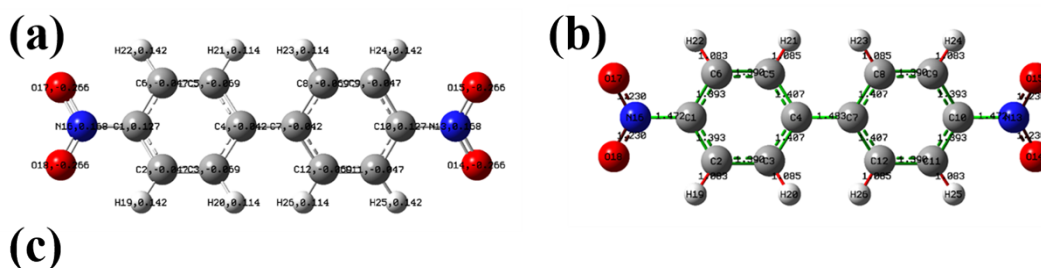

| Atom | No | $q_N$    | $q_{N+1}$ | $q_{N-1}$ | $f^+$    | $f^-$    | $f^0$     | $f^2$    |
|------|----|----------|-----------|-----------|----------|----------|-----------|----------|
| C    | 1  | 0.06568  | 0.05121   | 0.20824   | 0.01447  | 0.14256  | 0.078515  | -0.12809 |
| C    | 2  | -0.17096 | -0.08693  | -0.10123  | -0.08403 | 0.06973  | -0.00715  | -0.15376 |
| C    | 3  | -0.18018 | -0.09547  | -0.01359  | -0.08471 | 0.16659  | 0.04094   | -0.2513  |
| C    | 4  | -0.0245  | 0.00679   | 0.08656   | -0.03129 | 0.11106  | 0.039885  | -0.14235 |
| C    | 5  | -0.18018 | -0.09547  | -0.01359  | -0.08471 | 0.16659  | 0.04094   | -0.2513  |
| C    | 6  | -0.17096 | -0.08693  | -0.10123  | -0.08403 | 0.06973  | -0.00715  | -0.15376 |
| C    | 7  | -0.0245  | 0.00679   | 0.08656   | -0.03129 | 0.11106  | 0.039885  | -0.14235 |
| C    | 8  | -0.18018 | -0.09547  | -0.01359  | -0.08471 | 0.16659  | 0.04094   | -0.2513  |
| C    | 9  | -0.17096 | -0.08693  | -0.10123  | -0.08403 | 0.06973  | -0.00715  | -0.15376 |
| C    | 10 | 0.06568  | 0.05121   | 0.20824   | 0.01447  | 0.14256  | 0.078515  | -0.12809 |
| C    | 11 | -0.17096 | -0.08693  | -0.10123  | -0.08403 | 0.06973  | -0.00715  | -0.15376 |
| C    | 12 | -0.18018 | -0.09547  | -0.01359  | -0.08471 | 0.16659  | 0.04094   | -0.2513  |
| N    | 13 | 0.50937  | 0.27953   | 0.23568   | 0.22984  | -0.27369 | -0.021925 | 0.50353  |
| O    | 14 | -0.38049 | -0.19583  | -0.15159  | -0.18466 | 0.2289   | 0.02212   | -0.41356 |
| O    | 15 | -0.38049 | -0.19583  | -0.15159  | -0.18466 | 0.2289   | 0.02212   | -0.41356 |
| N    | 16 | 0.50938  | 0.27953   | 0.23568   | 0.22985  | -0.2737  | -0.021925 | 0.50355  |
| O    | 17 | -0.38049 | -0.19583  | -0.15159  | -0.18466 | 0.2289   | 0.02212   | -0.41356 |
| O    | 18 | -0.38049 | -0.19583  | -0.15159  | -0.18466 | 0.2289   | 0.02212   | -0.41356 |
| H    | 19 | 0.24177  | 0.11122   | 0.13531   | 0.13055  | -0.10646 | 0.012045  | 0.23701  |
| H    | 20 | 0.21459  | 0.09824   | 0.11586   | 0.11635  | -0.09873 | 0.00881   | 0.21508  |
| H    | 21 | 0.21459  | 0.09824   | 0.11586   | 0.11635  | -0.09873 | 0.00881   | 0.21508  |
| H    | 22 | 0.24177  | 0.11122   | 0.13531   | 0.13055  | -0.10646 | 0.012045  | 0.23701  |
| H    | 23 | 0.21459  | 0.09824   | 0.11586   | 0.11635  | -0.09873 | 0.00881   | 0.21508  |
| H    | 24 | 0.24177  | 0.11122   | 0.13531   | 0.13055  | -0.10646 | 0.012045  | 0.23701  |
| H    | 25 | 0.24177  | 0.11122   | 0.13531   | 0.13055  | -0.10646 | 0.012045  | 0.23701  |
| H    | 26 | 0.21459  | 0.09824   | 0.11586   | 0.11635  | -0.09873 | 0.00881   | 0.21508  |

**Figure S14.** (a) Chemical structure (Mulliken population) of P4. (b) Figure out the bond length of the P4 molecule. (c) Calculate the Fukui number per atom of the resulting P4 molecule.

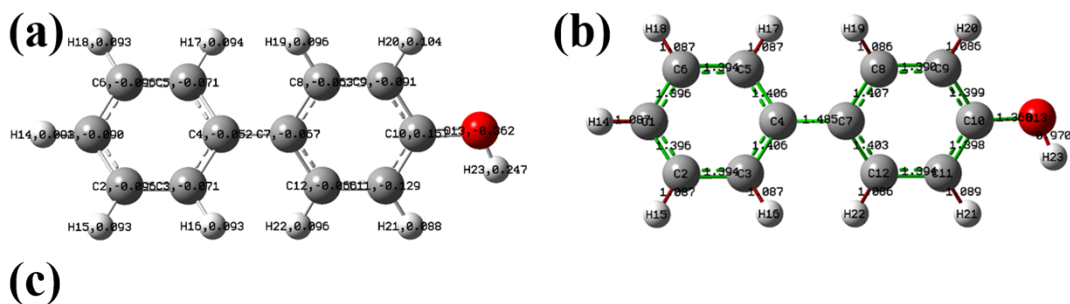

| Atom | No | $q_N$    | $q_{N+1}$ | $q_{N-1}$ | $f^+$    | $f$      | $f^0$    | $f^-$    |
|------|----|----------|-----------|-----------|----------|----------|----------|----------|
| C    | 1  | -0.2044  | -0.04811  | 0.049     | -0.15629 | 0.2534   | 0.048555 | -0.40969 |
| C    | 2  | -0.19187 | -0.11685  | -0.10112  | -0.07502 | 0.09075  | 0.007865 | -0.16577 |
| C    | 3  | -0.19439 | -0.07983  | -0.03215  | -0.11456 | 0.16224  | 0.02384  | -0.2768  |
| C    | 4  | -0.04091 | 0.0233    | 0.03398   | -0.06421 | 0.07489  | 0.00534  | -0.1391  |
| C    | 5  | -0.19386 | -0.0807   | -0.03149  | -0.11316 | 0.16237  | 0.024605 | -0.27553 |
| C    | 6  | -0.19159 | -0.11593  | -0.10117  | -0.07566 | 0.09042  | 0.00738  | -0.16608 |
| C    | 7  | -0.0778  | -0.00928  | 0.10925   | -0.06852 | 0.18705  | 0.059265 | -0.25557 |
| C    | 8  | -0.1678  | -0.06191  | -0.05823  | -0.10589 | 0.10957  | 0.00184  | -0.21546 |
| C    | 9  | -0.24995 | -0.15558  | -0.07491  | -0.09437 | 0.17504  | 0.040335 | -0.26941 |
| C    | 10 | 0.33942  | 0.21707   | 0.29295   | 0.12235  | -0.04647 | 0.03794  | 0.16882  |
| C    | 11 | -0.28282 | -0.17416  | -0.09826  | -0.10866 | 0.18456  | 0.03795  | -0.29322 |
| C    | 12 | -0.16818 | -0.05464  | -0.04093  | -0.11354 | 0.12725  | 0.006855 | -0.24079 |
| O    | 13 | -0.66905 | -0.34184  | -0.21891  | -0.32721 | 0.45014  | 0.061465 | -0.77735 |
| H    | 14 | 0.20061  | 0.07869   | 0.11086   | 0.12192  | -0.08975 | 0.016085 | 0.21167  |
| H    | 15 | 0.2006   | 0.0837    | 0.11535   | 0.1169   | -0.08525 | 0.015825 | 0.20215  |
| H    | 16 | 0.20217  | 0.08733   | 0.10855   | 0.11484  | -0.09362 | 0.01061  | 0.20846  |
| H    | 17 | 0.20291  | 0.08758   | 0.10908   | 0.11533  | -0.09383 | 0.01075  | 0.20916  |
| H    | 18 | 0.2008   | 0.08373   | 0.11547   | 0.11707  | -0.08533 | 0.01587  | 0.2024   |
| H    | 19 | 0.20556  | 0.0908    | 0.11571   | 0.11476  | -0.08985 | 0.012455 | 0.20461  |
| H    | 20 | 0.21526  | 0.09246   | 0.12345   | 0.1228   | -0.09181 | 0.015495 | 0.21461  |
| H    | 21 | 0.19861  | 0.0844    | 0.11522   | 0.11421  | -0.08339 | 0.01541  | 0.1976   |
| H    | 22 | 0.20538  | 0.09018   | 0.11525   | 0.1152   | -0.09013 | 0.012535 | 0.20533  |
| H    | 23 | 0.46131  | 0.21959   | 0.24304   | 0.24172  | -0.21827 | 0.011725 | 0.45999  |

**Figure S15.** (a) Chemical structure (Mulliken population) of P5. (b) Figure out the bond length of the P5 molecule. (c) Calculate the Fukui number per atom of the resulting P5 molecule.

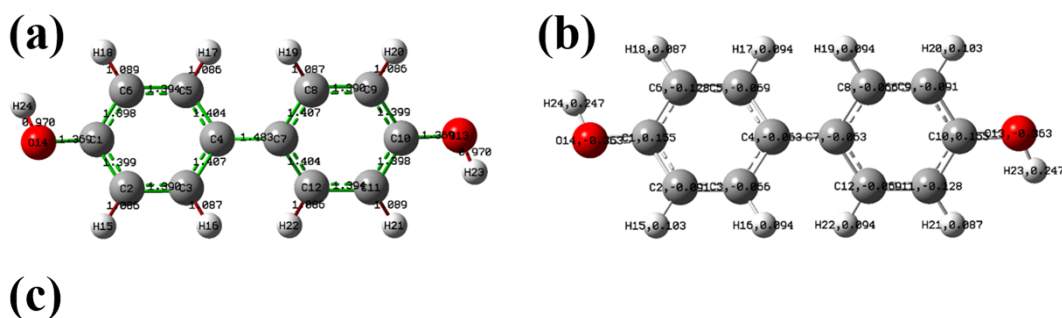

| Atom | No | $q_N$    | $q_{N+1}$ | $q_{N-1}$ | $f^+$    | $f^-$    | $f^0$    | $f^2$    |
|------|----|----------|-----------|-----------|----------|----------|----------|----------|
| C    | 1  | 0.33668  | 0.14962   | 0.27396   | 0.18706  | -0.06272 | 0.06217  | 0.24978  |
| C    | 2  | -0.24995 | -0.10137  | -0.0899   | -0.14858 | 0.16005  | 0.005735 | -0.30863 |
| C    | 3  | -0.17104 | -0.0556   | -0.05447  | -0.11544 | 0.11657  | 0.000565 | -0.23201 |
| C    | 4  | -0.07371 | -0.04196  | 0.06154   | -0.03175 | 0.13525  | 0.05175  | -0.167   |
| C    | 5  | -0.17111 | -0.05607  | -0.04063  | -0.11504 | 0.13048  | 0.00772  | -0.24552 |
| C    | 6  | -0.28245 | -0.11753  | -0.11054  | -0.16492 | 0.17191  | 0.003495 | -0.33683 |
| C    | 7  | -0.07371 | -0.04196  | 0.06154   | -0.03175 | 0.13525  | 0.05175  | -0.167   |
| C    | 8  | -0.17104 | -0.05561  | -0.05447  | -0.11543 | 0.11657  | 0.00057  | -0.232   |
| C    | 9  | -0.24995 | -0.10137  | -0.0899   | -0.14858 | 0.16005  | 0.005735 | -0.30863 |
| C    | 10 | 0.33668  | 0.14962   | 0.27396   | 0.18706  | -0.06272 | 0.06217  | 0.24978  |
| C    | 11 | -0.28246 | -0.11754  | -0.11054  | -0.16492 | 0.17192  | 0.0035   | -0.33684 |
| C    | 12 | -0.17111 | -0.05607  | -0.04063  | -0.11504 | 0.13048  | 0.00772  | -0.24552 |
| O    | 13 | -0.67025 | -0.34998  | -0.24217  | -0.32027 | 0.42808  | 0.053905 | -0.74835 |
| O    | 14 | -0.67025 | -0.34998  | -0.24217  | -0.32027 | 0.42808  | 0.053905 | -0.74835 |
| H    | 15 | 0.21451  | 0.08916   | 0.12206   | 0.12535  | -0.09245 | 0.01645  | 0.2178   |
| H    | 16 | 0.2039   | 0.09029   | 0.11236   | 0.11361  | -0.09154 | 0.011035 | 0.20515  |
| H    | 17 | 0.20445  | 0.09068   | 0.11249   | 0.11377  | -0.09196 | 0.010905 | 0.20573  |
| H    | 18 | 0.19809  | 0.08099   | 0.11384   | 0.1171   | -0.08425 | 0.016425 | 0.20135  |
| H    | 19 | 0.2039   | 0.09029   | 0.11236   | 0.11361  | -0.09154 | 0.011035 | 0.20515  |
| H    | 20 | 0.21451  | 0.08916   | 0.12206   | 0.12535  | -0.09245 | 0.01645  | 0.2178   |
| H    | 21 | 0.19809  | 0.08099   | 0.11384   | 0.1171   | -0.08425 | 0.016425 | 0.20135  |
| H    | 22 | 0.20445  | 0.09068   | 0.11249   | 0.11377  | -0.09196 | 0.010905 | 0.20573  |
| H    | 23 | 0.46088  | 0.22179   | 0.24146   | 0.23909  | -0.21942 | 0.009835 | 0.45851  |
| H    | 24 | 0.46088  | 0.22179   | 0.24146   | 0.23909  | -0.21942 | 0.009835 | 0.45851  |

**Figure S16.** (a) Chemical structure (Mulliken population) of P6. (b) Figure out the bond length of the P6molecule. (c) Calculate the Fukui number per atom of the resulting P6molecule.

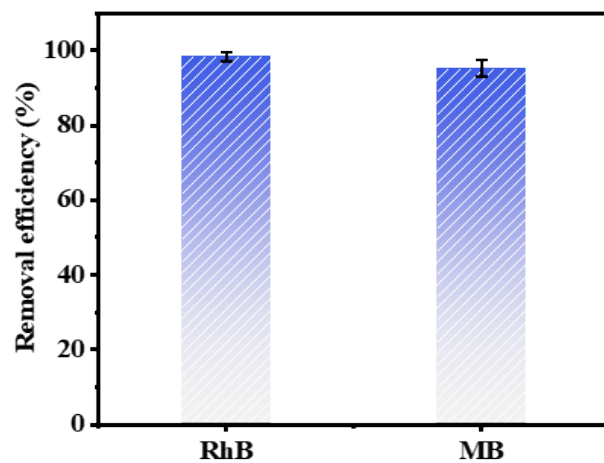

**Figure S17.** Photocatalytic degradation performance toward other two typical dyeing contaminants: Rhodamine B (RhB) and Methylene blue (MB).
